# Supplementary material for: Association of academic stress with sleeping difficulties in medical students of a Pakistani medical school: a cross sectional survey
Source: PeerJ. 2015 Mar 12;3:e840. doi: 10.7717/peerj.840 (PMC4369327; doi:10.7717/peerj.840)
Supplement: Supplementary Information 1 [file peerj-03-840-s001.xlsx]

## Sheet: Sheet1
Age	Gender	Background	Residence	Year	Statement1	Statement2	Statement3	Statement4	Statement5	Statement6	Statement7	Statement8	Statement9	Statement10	Statement11	Statement12	Statement13	Statement14	Serial_number	No_min	Stat5a	Stat5b	Stat5c	Stat5d	Stat5e	Stat5f	Stat5g	Stat5h	Stat5i	Stat6	stat7	Stat8	Stat9	Stat10	Sevrity1_1	Sevrity2_1	Sevrity3_1	Sevrity4_1	Sevrity5_1	severity6_1	Sevrity7_1	Sevrity8_1	Sevrity9_1	Sevrity10_1	Sevrity11_1	Sevrity12_1	Sevrity13_1	Sevrity14_1	Sevrity15_1
18	2	2	1	1	2	2	3	1	1	1	1	1	3	2	1	2	2	1	15	10	2	3	1	1	1	1	1	2	1	1	2	1	1	1	8	8	5	9	5	5	5	2	2	5	5	5	5	3	5
21	2	1	2	3	2	0	2	1	2	1	2	2	1	2	2	2	2	1	37	1	1	1	1	1	1	3	1	2	1	2	1	1	1	1	3	3	5	5	3	6	6	5	5	5	7	5	5	3	5
20	1	1	1	2	1	1	3	0	1	1	2	2	1	0	1	4	0	3	155	15	2	4	1	1	1	1	1	3	2	2	1	2	2	1	8	7	9	5	5	3	9	5	5	5	2	5	3	6	5
21	1	1	2	3	0	0	2	2	4	2	1	0	4	3	2	1	1	0	272	15	4	3	2	1	1	1	3	3	2	2	1	1	1	1	8	8	6	4	6	4	6	2	2	5	6	5	2	8	6
22	1	1	1	3	2	2	2	2	1	1	1	2	1	2	2	2	1	2	58	15	1	1	1	1	1	1	2	1	1	2	1	1	2	1	7	5	8	5	2	10	8	7	6	5	7	6	6	8	10
19	1	1	2	1	2	1	2	1	1	2	2	2	2	4	2	3	1	2	192	5	1	1	2	1	1	2	1	2	1	1	1	1	3	3	10	7	6	8	6	7	6	5	9	7	10	8	7	8	4
21	2	1	1	2	3	2	3	3	1	1	2	2	2	3	3	4	1	3	235	10	2	2	2	2	1	1	4	2	2	2	1	1	1	1	10	7	7	10	2	10	8	7	7	5	10	7	2	6	5
21	2	3	2	4	2	3	3	2	3	3	4	2	2	1	3	4	2	2	42	15	1	1	1	1	1	3	1	3	2	2	1	2	2	1	6	5	5	6	5	6	2	5	5	5	7	6	4	6	4
21	1	1	2	3	3	3	3	1	0	0	0	3	2	2	2	2	3	2	273	15	1	1	1	1	1	1	1	1	1	1	1	1	4	1	5	10	3	6	3	5	3	3	3	3	7	5	5	6	5
24	2	1	2	4	1	2	3	1	2	2	2	2	2	3	2	3	3	3	226	15	2	1	1	1	1	1	1	1	1	2	1	1	1	3	8	7	7	5	2	9	5	7	5	4	9	3	3	4	3
19	1	1	1	1	1	0	2	4	1	0	4	1	2	4	1	2	4	4	187	5	1	2	4	2	1	2	1	3	1	2	1	2	2	2	8	6	7	9	10	6	2	4	6	9	7	3	2	5	7
20	1	1	1	2	2	2	3	1	1	2	2	1	2	3	2	3	2	3	238	7	1	3	1	1	1	1	4	1	1	2	1	1	3	1	8	10	10	4	4	8	10	4	4	2	6	2	2	2	2
20	1	1	2	1	3	2	1	0	2	2	2	1	1	2	1	2	3	2	188	10	2	2	2	1	1	2	3	1	2	1	1	2	1	1	7	5	7	5	5	7	5	7	4	7	5	5	3	5	8
20	1	1	2	3	1	1	2	2	2	2	2	2	2	3	2	3	0	2	258	45	3	2	2	1	1	2	1	1	1	2	1	1	1	1	3	5	2	2	2	2	5	5	5	5	2	2	2	6	5
23	1	1	1	5	2	1	1	1	1	1	2	1	1	3	2	3	2	1	109	17.5	2	1	2	1	1	1	2	1	1	1	1	1	1	3	7	8	5	4	3	6	2	3	4	2	7	2	2	6	5
22	1	1	1	5	2	2	1	0	2	0	2	2	2	3	3	4	2	3	111	10	1	2	1	1	1	1	1	2	1	1	1	1	3	1	8	2	5	7	5	6	8	2	3	10	8	7	6	6	10
24	1	1	2	4	1	2	2	1	1	0	1	1	1	1	2	2	2	2	54	5	1	1	1	1	2	1	1	1	1	2	1	1	1	2	5	5	2	7	2	3	4	4	4	4	8	2	3	4	3
23	1	1	1	4	2	2	2	2	1	2	2	3	2	3	2	2	3	3	271	15	2	3	2	1	1	2	2	1	2	2	1	1	2	3	7	7	6	3	3	2	8	5	6	4	4	3	2	6	5
21	2	1	2	3	2	0	2	1	1	1	3	1	1	2	2	2	2	1	34	20	1	1	1	1	1	1	1	2	1	2	1	1	1	1	3	3	5	5	3	6	6	5	5	5	7	5	5	3	5
19	2	2	2	1	3	2	2	2	2	3	2	2	2	3	3	2	1	2	18	15	1	1	1	1	1	2	1	1	1	2	1	3	1	3	10	10	5	2	5	5	5	5	5	5	3	5	5	6	5
20	1	1	2	1	0	0	1	1	2	3	1	0	1	3	4	3	4	0	180	10	2	3	2	1	1	1	1	2	1	1	1	1	1	3	7	5	5	6	5	6	6	5	8	5	7	5	5	5	5
21	1	1	1	2	2	0	3	3	2	2	2	1	4	2	1	2	3	3	154	5	1	3	1	1	1	1	3	2	2	2	1	1	2	1	8	7	6	5	3	2	5	5	6	5	5	5	2	6	2
20	1	2	1	2	2	3	3	2	2	2	3	1	3	3	3	3	3	2	230	15	1	1	1	1	2	1	3	1	2	2	1	2	3	1	8	8	4	2	5	3	10	5	5	5	9	5	5	6	5
21	1	3	1	4	2	4	3	0	0	0	2	1	2	2	4	4	1	1	269	20	1	1	1	1	1	1	1	2	1	2	1	1	3	4	9	10	6	2	10	6	5	5	5	6	4	5	5	6	8
22	1	1	1	5	0	1	3	1	1	0	1	0	0	0	2	4	0	2	80	30	2	1	2	1	1	1	2	1	1	2	1	1	1	1	8	6	4	10	8	4	2	4	6	10	7	5	5	6	5
23	1	1	1	5	2	2	3	2	1	1	2	2	2	3	2	3	3	2	75	1	1	1	2	1	1	1	2	1	1	1	1	1	3	1	3	3	2	2	2	6	6	5	7	6	6	5	5	5	5
21	1	1	1	4	1	1	2	1	1	2	1	1	1	1	2	3	1	1	126	10	1	2	2	1	2	1	4	2	1	1	1	1	2	1	4	2	2	2	5	3	4	4	5	2	4	2	2	3	6
21	2	1	2	3	2	3	2	2	1	2	2	3	0	3	3	2	3	2	39	5	1	1	1	1	1	1	1	1	1	1	1	2	3	2	7	7	8	5	8	10	2	4	5	8	10	10	10	6	5
24	1	1	1	5	3	2	3	1	0	0	0	1	2	3	2	3	0	2	73	8	1	1	1	1	1	1	2	1	1	2	1	1	2	2	9	9	10	6	6	5	6	6	8	8	9	9	7	6	5
22	1	3	1	4	2	2	2	1	0	0	2	1	2	2	2	4	2	1	227	15	3	2	1	1	1	1	1	2	1	2	1	1	3	1	6	7	7	4	5	8	7	7	7	6	7	8	8	6	3
19	2	1	1	1	3	1	2	0	0	0	1	1	1	0	1	1	1	0	2	10	1	2	2	1	1	2	1	2	1	1	1	4	3	3	8	4	3	6	5	6	4	3	2	5	3	2	5	6	5
19	2	1	1	1	3	1	2	2	1	0	2	1	2	2	2	2	2	3	5	15	1	1	1	1	1	1	1	1	1	1	1	1	1	1	6	5	3	6	2	6	5	5	3	4	5	5	5	6	5
22	2	1	1	4	1	2	2	1	0	1	1	2	1	2	3	4	1	1	120	5	1	2	4	1	1	1	1	1	4	2	1	2	1	3	5	5	5	5	5	5	5	5	5	5	5	5	5	6	5
21	1	1	1	2	3	2	3	1	2	2	3	3	3	4	3	2	2	3	147	7	1	4	4	1	2	2	4	2	3	2	1	1	3	1	10	8	8	7	6	9	7	5	6	2	7	9	6	6	2
19	1	3	2	1	4	4	1	2	1	2	3	2	3	2	3	3	2	2	4	10	1	4	1	1	1	1	1	1	1	2	1	3	2	3	8	6	5	4	6	8	4	2	6	3	9	5	2	6	5
17	1	1	1	1	1	2	1	1	1	1	3	1	2	2	2	1	3	1	190	5	1	2	2	1	3	2	3	1	3	2	1	1	1	3	4	4	5	2	2	5	2	2	2	2	5	5	3	8	2
23	1	1	1	5	4	0	1	3	2	3	2	1	2	4	2	2	3	1	76	5	1	1	1	1	1	1	4	1	1	1	1	3	3	4	6	5	7	7	8	5	6	3	7	5	5	8	9	10	5
24	1	1	1	5	2	2	3	1	1	1	1	1	1	0	3	3	0	0	77	20	2	1	2	1	1	1	2	2	2	2	1	1	2	1	5	5	2	2	5	6	3	5	5	4	7	5	5	6	2
25	1	1	2	5	2	3	1	2	2	3	4	2	3	3	2	2	1	2	79	10	1	2	1	1	2	2	4	2	2	2	1	2	1	1	6	7	6	2	5	6	4	4	2	4	10	10	8	10	8
23	1	1	1	5	3	3	3	2	2	1	2	2	3	2	4	4	1	2	107	35	1	1	2	1	1	1	1	2	1	2	1	2	2	1	7	7	5	5	5	7	5	9	6	5	9	5	8	5	6
24	1	1	1	4	0	0	1	3	1	1	1	2	1	2	2	2	3	2	127	5	1	1	1	1	1	1	1	1	1	1	1	1	1	1	5	6	7	10	5	6	5	7	8	2	5	10	8	8	10
19	1	1	1	2	2	2	3	1	2	2	2	3	2	3	3	2	1	3	224	17	1	3	1	1	1	2	2	1	1	2	1	1	3	1	5	7	3	6	2	8	9	7	7	2	9	3	7	6	5
21	2	1	1	3	0	0	3	1	4	3	4	1	2	4	1	2	3	0	45	7	1	2	1	1	2	3	1	2	2	1	1	1	1	4	5	5	5	5	2	7	6	8	5	4	3	2	5	10	8
22	2	1	1	3	2	2	2	2	2	4	2	2	2	2	2	2	1	2	47	5	1	1	2	3	1	4	4	1	1	1	1	2	1	1	10	6	6	10	6	4	10	6	4	6	6	6	6	6	6
18	2	1	1	1	1	0	1	1	1	2	2	1	2	1	2	2	2	2	191	20	2	2	2	1	1	1	1	2	1	1	1	1	1	3	4	4	4	5	4	5	5	9	5	4	10	4	2	4	3
24	2	1	2	4	3	3	3	2	2	3	4	4	2	3	3	3	2	4	234	10	1	1	2	1	2	4	4	2	3	1	1	3	3	1	6	6	10	10	8	2	10	6	10	5	6	4	4	4	6
19	2	1	1	1	2	0	2	4	4	2	4	0	2	3	0	2	1	3	194	30	1	1	1	1	1	1	1	1	1	1	1	1	2	1	10	10	10	5	5	5	9	5	5	5	9	5	5	6	7
21	1	2	1	2	2	2	3	2	3	3	2	3	2	3	3	3	3	3	231	13	1	3	1	1	1	1	1	1	1	2	1	3	3	1	10	10	8	5	5	10	10	5	8	5	10	5	5	6	5
21	2	3	1	4	4	2	4	3	2	1	0	4	0	3	4	3	2	4	123	0.01	1	3	2	3	2	1	2	2	1	2	1	1	2	1	5	9	5	10	10	6	7	10	9	10	7	3	5	6	2
20	2	1	1	2	2	3	2	1	3	2	4	3	3	2	3	4	1	1	161	25	2	1	2	1	1	1	3	1	1	1	1	1	3	1	10	6	6	3	5	6	5	3	4	4	7	4	2	6	6
21	2	1	1	3	2	2	2	2	1	1	2	2	2	2	3	2	4	2	67	5	1	1	2	1	1	3	3	1	2	1	1	1	2	1	6	6	6	6	6	6	6	6	6	6	6	6	6	6	6
23	1	1	1	5	3	2	1	1	1	0	1	1	4	1	3	2	3	2	81	2	1	4	1	1	1	1	2	1	2	3	1	2	2	1	8	8	7	7	6	5	5	6	7	7	8	3	5	4	3
25	1	2	1	5	1	2	1	2	2	3	3	2	2	2	1	2	1	4	82	10	1	2	1	1	1	1	2	1	1	1	1	1	1	1	10	10	9	2	2	4	9	9	2	2	3	4	5	2	5
19	1	1	1	1	3	3	2	1	2	2	2	3	2	4	3	2	3	2	197	30	4	1	1	1	1	1	4	1	3	1	1	1	3	4	8	8	7	6	5	2	2	5	7	5	2	5	5	6	5
20	1	1	1	2	0	0	0	3	4	4	4	1	1	3	2	3	1	4	241	5	1	1	1	1	1	1	2	1	1	1	1	1	1	1	10	9	9	7	4	8	8	8	6	6	4	5	5	6	5
20	1	1	1	1	0	0	1	0	1	1	2	0	1	1	3	3	1	1	7	5	1	1	2	1	1	1	1	2	1	2	1	2	2	2	8	2	3	6	5	6	8	3	3	5	2	5	2	6	4
23	1	1	1	5	3	3	4	2	2	2	1	2	1	3	2	4	2	2	69	10	1	4	1	1	1	2	2	1	3	2	1	1	2	1	10	7	7	8	8	9	10	10	5	7	6	4	4	6	5
24	1	1	1	5	1	2	2	1	3	3	1	1	2	2	3	3	3	2	72	15	2	1	1	1	1	2	3	1	1	1	1	1	2	2	7	7	7	5	2	6	6	6	6	4	5	4	5	6	6
22	2	1	2	2	1	1	2	2	3	1	2	1	3	3	2	2	1	1	162	20	2	3	1	1	1	1	3	2	1	2	1	2	2	1	9	4	4	7	5	7	4	4	4	3	4	3	3	7	9
20	2	1	1	2	2	3	2	1	2	0	1	2	1	2	1	3	2	2	216	20	1	1	1	1	1	1	2	1	1	2	1	1	3	1	5	4	7	2	5	6	4	3	5	9	10	5	5	6	3
20	2	1	2	1	2	2	2	3	2	3	1	1	2	2	1	2	1	1	11	6	4	2	2	2	3	4	3	2	4	4	4	3	4	3	7	3	5	2	2	8	8	5	5	5	3	7	2	7	4
20	1	1	2	2	4	3	4	2	1	2	1	4	3	3	4	2	3	4	142	2.5	4	4	1	1	1	3	4	2	4	4	4	1	3	1	7	6	5	6	3	7	6	4	3	6	9	5	6	6	4
24	1	1	1	5	2	4	3	2	3	2	3	2	3	4	3	4	2	4	84	60	4	4	3	1	3	1	1	3	1	4	4	1	4	1	8	8	4	8	6	7	8	5	10	9	8	10	3	6	9
23	1	1	1	5	2	2	2	1	1	2	2	1	1	2	1	1	1	1	106	22.5	4	4	4	1	1	1	2	3	1	2	4	1	3	1	5	3	3	3	5	3	6	5	3	3	7	3	3	6	5
22	1	2	2	4	2	2	3	1	2	1	2	2	3	3	2	3	2	4	250	120	4	3	1	4	1	4	4	4	4	3	3	3	3	1	8	9	8	8	8	5	5	4	5	8	4	4	5	6	5
21	2	1	2	3	4	2	2	2	3	3	2	2	3	3	3	1	2	3	265	30	1	1	2	1	2	1	1	2	2	2	3	3	2	3	7	6	9	8	5	5	5	4	8	5	10	6	5	8	6
21	2	1	2	3	4	2	2	2	3	3	2	2	3	3	3	1	2	3	266	30	1	1	2	1	2	1	1	2	2	3	3	2	3	3	7	6	9	8	5	5	5	4	8	5	10	6	5	8	6
20	2	1	2	2	3	3	4	2	3	3	2	2	3	3	2	3	3	2	205	60	4	4	2	2	1	1	3	4	4	2	3	3	2	1	8	7	6	5	8	7	3	10	5	7	8	10	8	7	5
21	1	1	2	3	2	1	4	2	0	1	2	1	2	4	3	4	1	1	33	100	1	4	1	1	1	1	1	1	1	3	3	4	3	3	7	5	6	2	3	6	8	5	8	3	8	5	2	2	5
25	1	1	1	5	0	2	3	3	3	3	3	1	3	2	2	2	2	3	86	10	2	2	2	2	1	2	1	2	3	2	3	1	1	3	7	5	7	7	5	5	5	6	6	2	5	2	5	8	7
20	1	1	1	2	2	3	4	2	2	3	2	3	4	4	4	3	3	3	203	180	3	1	1	1	1	1	1	1	2	2	3	4	3	1	4	6	6	4	10	6	6	4	4	8	2	2	6	6	5
19	1	1	1	2	2	3	4	3	3	3	4	3	3	3	4	2	2	4	201	240	3	1	1	4	1	2	4	2	4	4	3	4	4	1	5	10	6	10	2	6	8	4	4	7	7	5	9	6	5
24	1	1	1	5	2	2	2	1	1	2	3	2	2	3	2	3	2	3	105	40	4	3	1	1	1	1	1	1	1	4	3	1	2	3	2	3	6	6	2	4	2	5	5	4	3	5	2	3	3
19	2	1	1	1	2	3	3	2	3	3	2	2	1	2	4	2	2	2	185	15	2	2	1	1	1	2	1	2	1	2	2	1	2	3	9	7	5	5	5	7	10	10	2	5	10	5	5	6	5
20	2	1	1	1	4	4	4	3	3	2	3	4	1	4	3	4	3	4	16	25	3	4	1	3	1	3	3	3	4	1	2	4	2	2	8	9	6	2	2	10	9	5	6	2	9	8	9	6	5
25	1	1	2	5	2	2	2	3	3	1	2	1	2	2	1	3	3	3	94	30	2	2	2	1	1	2	4	2	2	3	2	1	2	1	7	6	5	3	8	7	7	6	5	3	5	6	7	8	8
25	1	1	1	5	3	1	3	1	2	3	0	3	0	3	3	3	2	1	96	30	2	3	1	1	1	2	4	2	2	3	2	2	3	1	7	6	5	3	8	2	6	3	2	9	2	5	6	7	6
19	1	1	1	2	4	3	4	2	2	3	4	2	2	2	3	3	2	3	236	10	4	4	3	2	1	1	2	3	3	3	2	2	3	1	8	8	10	6	8	6	8	6	6	8	8	8	6	6	6
20	2	3	2	2	4	3	3	2	2	2	1	4	2	2	3	3	2	4	219	20	2	3	1	1	1	2	4	3	1	4	2	2	4	3	10	10	10	8	8	10	10	10	10	9	9	8	7	8	7
19	2	1	1	1	3	4	3	2	0	2	3	3	2	2	2	3	1	3	6	15	1	3	1	1	1	1	3	2	2	3	2	1	2	1	8	8	5	9	5	5	5	2	2	5	5	5	9	9	5
18	2	3	2	1	1	3	4	2	1	2	3	3	2	3	1	1	2	0	29	3	2	2	2	2	2	2	2	3	2	2	2	4	4	3	2	2	3	4	3	3	5	6	5	5	2	2	5	6	7
19	2	1	1	1	2	0	2	1	1	1	2	2	0	1	1	4	3	0	196	10	1	1	1	2	1	1	2	2	1	2	2	2	2	2	8	8	8	5	2	8	7	7	5	5	8	7	5	2	5
22	1	3	1	4	4	4	4	3	3	3	3	3	3	4	3	3	3	4	113	40	4	4	1	3	2	3	4	4	4	3	2	4	4	3	8	5	7	7	7	6	8	6	2	8	8	8	8	6	10
25	1	3	1	4	0	0	0	0	1	0	1	1	0	1	0	3	2	4	130	60	4	4	1	1	1	1	1	1	1	2	2	1	2	1	7	5	7	7	5	4	7	4	5	2	4	5	5	5	5
23	1	1	1	4	3	3	4	1	2	2	2	4	1	2	4	4	2	4	132	15	1	3	2	1	1	2	3	3	2	2	2	3	2	1	8	8	7	7	5	10	7	10	7	7	8	8	7	2	10
20	1	1	1	1	3	4	3	2	2	2	3	3	3	3	3	4	1	4	175	20	2	4	1	4	2	1	3	2	2	2	2	2	2	3	3	3	3	6	5	2	4	5	5	5	3	5	2	6	5
21	2	1	2	2	3	2	3	3	1	2	3	2	3	3	2	3	2	2	139	35	3	2	1	1	1	2	3	2	1	2	2	2	3	3	7	6	5	6	3	7	4	5	4	6	4	8	9	10	6
20	1	1	1	1	2	2	3	1	1	3	3	3	2	2	3	3	2	3	173	15	1	4	2	1	1	3	4	3	1	2	2	2	4	1	8	8	9	5	3	8	7	9	6	7	9	5	5	6	5
21	1	1	1	2	3	3	2	2	2	1	2	2	2	2	3	2	3	4	212	30	3	1	1	1	1	2	3	2	1	2	1	1	4	3	9	10	5	4	6	6	10	3	3	4	2	2	2	6	2
24	2	1	2	4	2	2	3	1	2	2	2	2	1	1	3	4	1	2	214	20	4	3	2	1	1	1	2	1	1	2	1	2	2	3	6	6	4	8	4	8	10	5	5	4	7	5	4	6	8
23	2	1	1	4	2	4	4	2	2	2	3	3	3	3	2	4	1	4	125	10	4	4	2	4	1	3	3	4	1	4	1	1	4	1	5	10	10	7	10	2	6	5	7	7	5	3	5	6	5
23	1	1	1	5	4	3	2	2	2	1	1	2	1	2	3	3	2	3	97	3	4	4	1	1	1	1	4	3	2	3	1	3	2	1	10	9	9	6	6	5	5	7	7	8	4	4	5	2	3
20	2	1	2	2	2	4	2	3	2	1	4	2	2	3	2	0	3	2	165	15	1	1	2	1	1	1	4	3	1	2	1	1	2	3	7	8	7	9	7	8	10	5	4	2	7	6	5	10	5
20	1	1	2	1	2	0	1	0	0	1	1	2	1	3	1	2	4	0	186	30	2	2	2	1	1	2	1	1	1	2	1	3	3	3	8	6	7	6	5	8	7	2	5	5	8	5	2	9	2
21	1	1	2	3	2	0	3	1	3	2	2	0	0	4	0	1	4	0	36	20	2	2	1	1	1	1	1	2	1	3	1	1	4	3	9	9	9	7	2	4	9	9	5	5	7	5	5	6	5
23	1	1	1	5	3	4	3	2	1	2	2	1	2	1	3	4	1	2	93	30	4	1	2	1	2	1	1	3	1	2	1	2	1	4	7	7	2	2	5	6	7	3	7	3	7	6	8	9	3
24	1	2	1	4	3	3	3	2	1	3	4	3	2	2	3	4	2	4	253	60	1	4	3	3	2	1	4	3	2	3	1	3	4	1	10	6	8	5	4	3	2	2	2	2	7	2	4	5	2
20	1	1	1	2	1	3	2	2	2	3	3	0	2	4	2	2	2	3	167	10	1	1	4	1	1	1	1	1	1	3	1	2	3	4	9	6	6	8	3	6	5	5	6	8	7	7	8	2	5
21	1	3	2	2	3	3	4	2	2	1	3	3	2	2	3	4	3	2	138	15	3	3	2	1	1	1	1	2	1	2	1	3	3	4	9	9	8	7	7	8	9	9	7	6	8	8	8	6	7
18	1	2	1	1	3	3	4	2	1	1	2	4	2	2	3	4	3	3	13	30	3	3	3	1	1	3	4	1	3	3	1	3	2	1	7	8	6	9	5	8	6	5	2	7	6	5	5	5	5
20	2	1	1	3	2	4	4	3	4	3	4	4	3	4	4	3	0	4	255	60	4	3	3	1	1	1	3	3	2	4	1	3	4	1	8	9	6	7	8	9	2	10	6	8	8	6	2	6	2
21	2	1	2	3	4	0	1	2	1	2	1	0	0	1	0	2	3	0	274	15	1	1	4	1	1	1	1	2	1	1	1	1	1	1	10	5	5	5	5	6	8	10	5	5	10	5	5	5	5
21	2	1	2	3	4	0	1	2	1	2	1	0	0	1	0	3	3	0	275	15	1	1	4	1	1	1	1	2	1	1	1	1	1	1	10	5	5	5	5	6	8	10	5	5	10	5	5	5	5
21	2	1	2	2	3	1	4	4	3	2	3	2	4	2	0	1	0	1	207	30	2	1	2	2	1	2	3	2	3	3	1	2	3	3	8	8	8	8	8	4	8	5	2	8	10	8	4	6	8
18	2	1	2	1	2	1	2	0	1	1	2	2	1	2	2	3	3	2	27	5	1	1	1	1	1	1	1	1	1	3	1	1	3	3	5	6	7	8	9	6	2	3	4	5	6	4	4	5	5
20	2	3	2	4	3	3	4	1	2	3	3	1	3	2	3	3	2	2	56	30	4	3	4	2	1	1	1	1	2	2	1	3	3	3	8	7	9	6	7	9	5	5	5	4	9	3	2	9	5
20	2	1	1	3	1	1	2	2	2	2	3	2	2	2	2	3	2	1	57	30	4	1	1	1	1	2	2	1	1	3	1	2	2	1	8	7	6	4	3	3	5	4	4	3	6	2	2	2	5
21	2	1	1	3	4	4	4	1	1	2	4	3	3	3	4	4	0	4	59	10	4	3	1	1	1	1	1	2	2	2	1	1	3	3	7	9	6	7	4	3	8	7	6	6	10	10	10	6	6
21	2	1	1	3	2	4	0	0	1	0	1	1	1	2	3	3	1	3	60	2	1	1	4	1	1	2	2	2	3	2	1	3	2	3	5	3	6	2	3	6	2	4	2	3	9	5	5	6	2
24	1	1	2	5	3	3	4	2	2	2	2	3	2	2	3	4	2	2	100	30	4	2	1	1	1	2	1	2	1	3	1	1	2	2	7	7	8	6	5	5	6	6	8	7	7	7	6	5	4
23	1	1	1	5	1	1	3	1	1	1	1	2	1	2	2	3	2	2	112	17.5	2	1	2	1	2	1	1	1	1	2	1	1	2	1	8	5	5	3	5	2	4	5	4	2	7	2	3	6	2
23	2	2	1	2	3	3	3	1	1	1	2	2	3	2	3	4	3	2	148	60	4	2	1	3	1	1	3	2	3	3	1	1	3	1	6	5	6	7	7	5	8	4	3	5	5	5	7	4	3
20	1	1	1	2	2	2	2	2	1	1	2	2	1	3	2	3	1	2	159	30	3	1	1	1	1	1	3	2	1	2	1	2	3	1	9	4	2	4	5	6	9	5	5	2	7	5	5	6	4
21	2	1	1	2	3	3	4	2	2	2	4	2	3	3	4	2	1	2	164	20	3	2	3	2	1	1	3	4	3	3	1	2	3	1	9	6	8	2	3	7	8	8	4	4	9	8	7	8	3
18	1	1	1	1	3	4	4	2	0	3	3	1	1	2	3	2	2	3	176	10	1	4	1	1	1	2	3	1	1	3	1	2	3	3	7	7	8	8	2	7	8	5	4	5	7	5	2	9	2
22	1	1	1	4	2	3	3	0	2	2	3	3	3	2	2	3	2	2	215	20	1	3	1	1	1	1	2	1	1	2	1	1	2	1	6	2	2	6	5	6	6	5	5	5	2	5	5	6	5
20	2	1	1	2	2	2	1	0	1	0	2	0	1	1	4	4	1	2	218	20	3	1	1	1	2	2	3	2	2	2	1	1	2	1	9	7	2	7	5	6	8	5	5	5	5	5	5	6	8
20	2	1	1	3	2	3	3	3	4	3	4	4	3	4	4	3	0	4	254	60	4	3	3	1	1	1	3	3	2	4	1	3	4	1	8	9	6	7	8	9	2	10	6	8	8	6	2	6	2
23	1	1	2	4	2	2	2	2	2	3	3	1	2	2	2	3	3	2	41	20	3	3	1	1	1	1	1	1	1	2	1	1	1	1	4	6	3	7	4	5	4	2	6	2	4	5	4	6	2
22	1	1	1	5	2	3	2	2	2	1	2	2	1	2	3	3	2	3	91	60	4	3	2	1	1	1	3	2	1	2	1	1	1	1	2	2	4	3	4	6	6	5	5	5	7	5	5	6	5
21	2	1	2	3	2	1	2	3	2	2	3	2	1	3	3	3	2	2	262	35	4	2	2	1	1	2	1	2	3	2	1	1	3	3	7	7	6	7	5	8	6	5	6	5	3	4	3	3	5
21	2	1	2	3	2	1	2	3	2	2	3	2	1	3	3	3	2	2	263	35	4	2	2	1	1	2	1	2	3	2	1	2	3	3	7	7	6	7	5	8	6	5	6	5	3	4	3	3	5
18	2	2	2	1	1	2	2	2	2	2	3	1	3	3	3	3	3	2	30	7	2	1	2	1	1	1	3	1	2	1	1	3	3	3	5	5	4	2	2	6	7	5	3	7	2	2	5	2	5
22	2	1	2	4	3	2	3	1	2	1	0	4	1	2	4	4	1	2	35	15	4	3	1	1	1	1	1	2	4	4	1	3	3	1	5	5	4	2	6	3	3	5	5	4	6	8	8	7	5
20	2	1	2	2	2	2	3	2	2	1	2	2	2	2	3	3	2	2	166	30	4	4	3	3	4	2	2	1	1	2	1	2	4	3	7	7	2	6	5	3	4	5	5	5	7	5	5	5	5
20	1	1	2	2	0	3	3	2	1	2	2	0	0	3	2	2	2	0	209	30	4	1	1	1	1	3	2	3	1	4	1	1	3	1	10	8	6	8	5	5	7	5	3	6	6	10	8	9	5
21	2	1	2	2	3	1	3	2	1	2	1	2	2	1	3	2	1	4	137	15	3	2	2	1	1	2	3	1	1	3	1	4	3	4	7	7	7	9	6	7	6	6	4	6	9	6	4	4	4
21	2	1	1	2	1	2	1	1	2	2	2	2	2	2	2	4	2	1	152	10	2	3	2	1	4	2	3	2	2	2	1	3	2	1	7	4	5	3	5	9	7	3	3	2	8	5	5	7	4
19	2	3	1	1	2	2	1	0	3	3	1	0	2	0	1	3	2	2	12	7.5	2	4	2	1	1	3	3	3	3	3	1	1	3	1	5	4	3	4	2	6	3	5	5	5	2	3	2	6	3
20	1	1	2	2	3	0	0	2	3	1	2	1	2	2	4	1	2	4	204	70	3	1	3	1	1	2	4	1	2	2	1	2	4	1	9	6	9	10	3	5	10	10	5	10	10	8	5	8	2
22	2	1	1	4	3	2	1	1	2	3	3	2	3	2	4	4	0	1	121	12.5	3	1	1	1	1	1	4	4	2	2	1	3	2	1	7	7	9	4	6	5	10	3	3	10	10	10	10	6	9
20	2	1	2	2	1	1	3	1	1	1	3	1	2	1	3	4	2	0	223	17	2	1	1	1	1	1	3	2	1	3	1	2	3	3	6	5	7	2	5	6	8	7	6	4	9	6	9	3	2
19	2	1	1	1	4	3	4	3	2	3	1	4	4	2	4	4	3	2	28	30	4	4	3	3	3	3	4	4	3	3	1	4	4	1	10	9	8	6	5	10	5	9	5	5	10	9	8	6	3
22	2	1	1	5	4	3	3	3	3	3	4	1	3	4	3	4	2	1	101	20	2	1	3	1	2	1	1	3	1	2	1	3	2	1	9	10	8	7	2	9	7	9	9	7	9	7	7	6	5
20	1	1	1	2	2	2	3	3	2	2	3	3	2	3	1	2	2	3	163	10	3	2	2	1	1	1	2	1	1	3	1	1	2	1	7	7	8	9	6	9	10	5	5	5	4	4	5	2	4
18	1	1	1	1	4	4	4	3	2	2	3	3	3	4	3	4	3	4	171	30	4	4	2	4	3	3	4	3	4	3	1	4	3	1	10	9	10	7	10	10	7	10	7	8	10	9	9	5	5
19	1	1	1	1	2	4	4	1	3	3	2	4	2	3	3	4	4	3	179	4	1	3	1	2	1	3	2	1	4	1	1	4	3	1	9	8	7	5	4	7	7	8	4	8	7	2	3	6	5
21	2	1	2	2	1	0	1	3	2	2	1	1	2	3	0	2	2	1	217	20	2	3	1	1	1	1	3	1	1	2	1	3	2	1	7	5	4	4	4	3	5	5	6	5	4	4	4	6	4
20	2	1	2	3	3	2	1	1	2	2	4	2	2	3	2	3	3	2	43	60	1	1	1	1	1	1	1	1	1	3	1	1	2	1	9	6	9	7	10	8	7	8	7	3	8	6	5	6	2
22	2	1	2	3	2	2	1	1	1	1	1	2	2	2	2	3	2	3	251	90	1	2	1	1	1	1	4	4	2	3	1	4	1	3	7	7	6	8	8	3	2	5	2	2	7	2	5	6	5
22	2	1	2	3	2	2	1	1	1	1	1	2	2	2	2	3	2	3	252	90	1	2	1	1	1	1	4	4	2	3	1	4	1	3	7	5	6	8	8	3	2	5	2	2	7	2	5	6	5
23	2	1	2	4	2	2	1	1	1	1	1	2	2	3	2	3	1	2	124	15	3	3	1	1	2	2	1	1	1	2	1	1	2	3	8	7	5	4	6	6	6	5	5	5	8	5	5	6	5
22	1	3	2	4	2	1	2	1	2	2	0	2	2	2	3	4	1	2	136	10	3	1	1	1	1	1	1	1	2	2	1	1	2	3	8	5	9	5	5	7	3	3	4	2	7	5	5	7	5
20	1	1	2	2	4	3	3	2	2	2	3	0	2	3	3	4	3	3	220	20	1	4	4	1	1	1	4	2	1	3	1	4	3	1	8	8	8	8	5	5	8	8	8	7	8	8	6	8	8
19	2	3	2	1	4	3	2	2	1	1	3	3	0	3	4	3	2	4	172	30	2	4	3	2	1	3	2	3	2	2	1	1	2	1	8	5	6	7	8	2	5	5	5	6	8	2	5	6	5
22	2	1	2	4	2	3	2	2	3	3	3	2	2	4	3	2	3	3	117	10	2	2	3	1	2	2	3	2	2	2	1	3	3	1	4	5	6	3	3	6	5	4	4	5	7	7	5	3	6
21	2	1	2	2	3	2	3	2	2	2	1	3	2	2	2	3	2	1	140	60	1	2	2	2	1	3	3	1	1	3	1	2	3	3	7	6	5	8	2	4	6	7	2	3	2	8	2	7	5
23	1	1	1	5	3	2	4	1	3	4	3	3	4	3	3	4	2	2	95	20	1	2	1	1	1	2	3	3	1	2	1	3	2	1	5	3	5	2	6	7	8	8	5	4	9	4	4	3	2
19	1	1	2	1	3	2	2	2	3	1	3	1	2	3	1	3	3	3	17	30	3	1	1	1	1	1	1	1	1	2	1	1	3	3	6	7	10	5	8	2	5	5	4	10	4	2	2	6	4
20	2	1	1	2	1	1	2	2	1	1	1	1	3	3	1	1	2	2	20	20	1	2	3	1	2	1	3	1	1	2	1	3	2	3	7	7	6	6	6	5	5	3	3	2	7	8	8	9	5
19	1	1	1	1	2	2	3	2	1	2	2	2	2	1	2	4	2	1	31	5	4	3	1	1	1	3	2	2	1	2	1	2	3	4	10	7	7	6	5	10	8	7	7	8	7	7	8	9	5
23	1	1	1	5	3	1	2	2	2	1	3	1	3	1	2	2	2	2	98	10	1	3	1	1	1	1	4	1	1	2	1	1	3	1	7	7	6	6	5	6	6	9	5	5	7	5	5	6	5
22	1	1	2	5	3	3	2	2	3	2	2	3	2	2	3	3	2	1	99	35	3	2	1	1	2	2	3	3	2	2	1	2	3	1	7	7	7	7	9	9	7	7	8	8	9	3	5	6	5
18	2	1	1	1	4	3	3	2	0	0	0	0	1	2	4	4	2	2	178	20	4	3	2	1	1	1	4	3	2	2	1	1	1	3	10	10	8	8	5	5	3	5	7	10	2	5	5	5	5
21	1	1	1	2	4	4	4	1	3	3	2	3	4	3	4	4	2	3	210	30	2	1	1	1	1	2	3	1	1	2	1	3	4	3	9	6	6	5	2	6	10	10	4	6	2	7	8	6	6
22	2	3	2	4	3	3	4	1	2	2	1	2	2	1	1	2	2	3	51	30	2	3	2	1	2	2	1	2	2	4	1	2	1	1	5	7	5	5	2	4	3	3	2	4	10	2	2	4	5
22	2	1	1	3	2	3	2	1	1	4	3	0	1	2	4	4	2	3	52	30	4	4	3	1	1	1	4	2	4	2	1	2	1	1	10	6	6	5	3	6	5	10	3	3	10	5	5	6	8
21	2	1	2	3	1	2	2	1	1	2	2	2	1	3	2	2	1	2	53	30	1	1	1	1	1	1	1	2	1	2	1	2	2	1	5	7	7	5	6	7	6	4	5	5	4	6	7	5	7
21	2	1	2	4	2	2	2	2	1	2	1	2	1	1	3	3	1	3	55	2	1	2	1	1	1	2	1	2	2	1	1	2	3	1	5	7	5	2	2	5	7	2	5	5	3	3	3	5	5
25	1	2	1	5	4	3	4	0	0	0	2	0	0	1	0	4	1	2	103	60	1	4	1	1	1	1	4	1	4	1	1	1	1	4	10	10	6	10	5	6	3	5	5	10	10	10	10	10	9
23	1	1	1	5	2	4	4	1	2	2	3	3	2	2	3	4	2	4	110	30	2	1	1	4	2	1	1	2	3	4	1	4	4	2	10	9	7	5	5	8	7	9	9	2	7	5	3	6	2
22	2	1	1	4	2	2	1	1	0	0	2	2	3	1	2	2	2	1	119	10	1	2	1	1	1	1	1	3	1	2	1	1	1	3	7	8	7	6	8	8	5	8	6	6	6	4	6	6	5
21	1	1	1	2	1	1	2	3	1	1	1	1	1	2	1	2	1	0	157	60	4	3	4	1	1	3	1	2	1	3	1	1	1	4	7	7	7	2	6	5	4	5	5	5	4	5	5	6	5
20	1	1	2	2	4	3	3	0	3	2	4	2	2	4	4	4	3	4	168	30	2	4	4	1	1	1	3	3	1	4	1	4	3	1	8	8	8	6	5	5	8	8	8	3	8	8	6	8	8
20	1	1	1	1	0	2	3	2	2	1	2	2	1	3	3	4	1	2	193	10	1	1	1	1	1	2	2	1	1	2	1	3	3	1	10	8	5	10	7	7	9	7	7	10	7	5	10	5	7
21	2	1	2	3	2	2	3	2	3	1	2	4	2	2	4	4	2	3	245	300	2	3	1	1	1	1	1	2	2	2	1	2	2	3	7	5	7	4	5	10	6	5	5	4	9	7	10	6	2
21	2	1	2	3	2	2	2	3	3	3	2	2	3	3	1	1	2	2	264	30	3	3	1	3	3	2	3	1	2	3	1	1	3	3	9	9	6	6	4	4	4	4	4	6	9	9	4	4	4
20	2	1	1	1	3	3	1	0	0	2	4	4	4	4	4	4	4	3	14	15	3	1	4	1	1	4	1	4	3	2	1	3	3	3	10	10	10	8	10	10	10	4	5	5	6	5	5	6	2
20	1	1	2	1	3	3	2	0	1	0	4	0	2	1	4	4	3	1	19	25	3	3	1	1	1	1	4	3	1	3	1	1	2	3	6	7	5	6	5	6	8	5	5	5	8	2	9	6	5
22	1	2	2	3	1	1	2	1	1	2	2	2	2	2	1	2	2	2	40	5	1	1	1	1	1	2	1	1	1	1	1	2	2	3	7	5	6	2	3	6	8	5	8	3	8	5	2	2	5
22	2	1	1	5	4	4	4	2	2	3	3	3	3	2	2	2	2	4	83	30	4	3	2	3	1	1	4	3	4	4	1	4	3	1	9	9	9	9	9	9	3	5	4	4	4	5	9	6	4
24	1	1	1	5	1	1	2	1	3	1	1	2	2	2	4	4	2	1	85	10	2	1	2	1	1	1	1	1	1	2	1	2	2	1	5	6	7	6	5	7	6	5	5	3	5	5	5	6	10
24	1	1	2	5	1	2	2	2	2	3	3	2	3	3	2	2	2	1	87	30	4	3	3	1	1	2	4	2	2	2	1	1	2	2	5	6	8	2	2	6	6	4	8	4	4	4	4	6	5
23	1	3	2	4	3	3	3	1	1	0	1	2	2	1	3	2	2	2	114	45	3	2	1	1	1	1	1	1	1	3	1	4	3	3	6	7	8	7	5	4	2	5	5	6	7	5	8	3	4
22	1	1	1	2	3	2	4	1	2	2	2	3	1	1	4	3	2	2	208	30	4	3	3	1	1	2	4	2	2	2	1	2	2	1	6	4	9	7	3	4	8	4	5	7	4	10	4	9	2
23	2	1	2	4	4	2	3	1	0	1	1	2	2	2	3	3	2	2	128	15	2	4	2	1	3	2	3	3	3	3	1	2	3	1	8	8	7	9	6	4	7	5	4	7	9	9	9	10	3
19	2	1	1	1	3	2	3	1	1	1	0	2	2	1	2	4	2	2	22	30	3	2	3	1	1	2	2	1	1	3	1	4	2	1	9	6	6	2	5	6	5	6	5	6	7	5	5	6	5
19	1	1	1	2	3	4	3	3	2	3	3	3	3	3	2	3	2	3	149	5	1	4	4	1	1	1	1	3	1	2	1	4	3	1	7	7	8	8	4	10	7	7	6	6	9	9	9	6	5
23	2	1	1	4	1	2	1	0	0	1	1	2	2	2	2	2	3	2	131	100	4	1	1	1	1	1	1	1	2	3	1	2	3	1	4	7	3	4	2	6	3	5	2	4	7	5	6	7	3
20	2	1	2	2	3	2	3	2	1	2	2	3	1	3	3	3	2	1	151	10	1	4	1	1	1	2	4	1	2	1	1	2	1	3	7	5	5	3	3	3	5	5	3	3	7	5	5	7	5
19	2	3	2	1	1	2	1	1	1	0	0	1	1	1	0	2	2	1	184	30	3	2	1	1	1	1	2	1	1	3	1	1	3	3	10	8	10	10	7	6	9	5	5	8	10	5	5	9	5
21	2	1	2	3	2	2	4	1	1	2	2	2	2	4	1	2	2	2	260	45	4	2	1	1	1	1	1	1	1	3	1	1	1	3	6	5	6	5	5	6	5	8	8	5	6	8	8	6	3
20	2	1	1	1	3	3	3	#NULL!	2	3	3	1	3	3	1	2	3	2	26	2	1	1	1	1	1	1	1	1	2	2	1	4	3	3	9	8	7	6	5	9	9	4	6	6	5	5	5	6	3
20	1	1	1	2	2	3	4	0	2	3	4	1	4	0	3	3	3	4	158	60	4	3	1	1	1	2	4	2	2	3	1	3	4	1	10	6	9	10	4	5	7	5	5	4	7	5	2	6	3
24	1	1	1	5	2	2	1	3	3	1	4	4	3	3	4	2	4	2	102	30	4	2	2	1	2	2	2	3	3	3	1	2	4	1	7	7	7	2	2	7	2	2	5	6	2	3	4	5	5
19	2	1	2	1	3	0	0	2	1	1	2	0	1	2	1	3	1	1	182	15	1	3	1	1	1	1	3	1	1	2	1	1	1	3	4	7	7	3	5	7	6	6	2	5	8	3	5	6	5
20	1	1	1	1	2	3	0	2	2	3	2	0	4	3	3	2	2	1	25	2	2	1	1	1	1	1	1	4	1	3	1	3	1	1	10	8	6	9	5	8	6	4	2	7	5	4	5	5	5
22	1	1	1	4	2	2	2	0	1	1	2	3	1	1	2	3	2	3	64	15	1	1	1	1	1	1	1	1	1	3	1	2	2	1	7	3	2	6	2	6	4	2	3	2	7	5	5	6	5
23	1	1	2	5	3	2	2	2	1	1	2	1	3	3	2	2	3	3	92	7	1	2	1	1	2	3	3	4	2	3	1	2	3	3	6	6	8	8	8	4	10	8	8	8	8	8	2	2	8
20	2	1	1	2	1	1	2	1	1	1	2	2	2	2	2	3	2	1	144	20	1	1	1	1	1	1	3	1	1	3	1	1	3	1	7	4	3	8	2	6	2	3	4	7	7	5	5	6	3
21	2	1	2	2	2	2	3	1	2	1	3	2	3	3	3	2	2	3	146	7.5	1	1	2	1	1	1	4	3	3	2	1	3	4	1	8	8	6	5	2	6	10	8	8	8	9	6	2	2	6
19	1	3	1	2	4	4	4	0	1	2	3	3	2	2	3	2	3	3	211	30	4	2	1	1	1	3	4	3	1	4	1	2	3	1	10	10	10	9	6	2	9	5	5	8	8	8	8	6	5
19	2	1	2	1	3	3	4	1	1	1	2	3	1	1	3	3	1	4	24	17.5	2	4	1	3	4	3	1	3	2	4	1	2	3	1	9	8	10	5	6	9	3	10	10	9	8	8	6	6	6
26	1	2	1	5	1	3	4	2	3	3	3	2	3	2	3	3	3	2	88	15	2	2	2	1	1	1	1	1	1	3	1	1	2	1	7	5	7	7	5	7	5	5	5	6	6	2	5	6	5
23	1	1	1	5	2	3	3	2	3	2	2	3	2	2	1	3	1	1	89	60	4	1	1	1	1	3	1	1	1	2	1	2	2	1	2	7	6	2	5	6	6	5	5	5	4	5	5	7	3
26	1	1	1	5	1	3	4	1	2	2	2	2	2	2	3	3	2	2	90	10	2	3	1	1	1	1	4	2	2	2	1	1	2	4	5	10	2	6	2	3	7	7	5	8	7	7	6	6	5
21.5	1	1	2	4	2	3	3	4	4	2	3	2	2	3	1	2	2	2	115	10	2	1	1	1	1	1	4	2	1	3	1	4	2	3	7	7	8	6	6	6	7	6	6	6	9	5	5	6	9
20	1	1	1	2	1	0	2	2	2	1	1	1	1	4	2	3	3	3	156	10	1	2	3	2	1	3	1	3	1	3	1	2	3	1	7	7	2	2	5	6	3	5	5	2	7	5	5	6	5
19	2	3	2	1	4	3	4	2	1	1	2	2	3	2	3	3	1	2	170	15	4	3	1	1	1	1	1	1	1	3	1	1	3	3	4	5	5	5	7	6	6	7	5	4	5	7	6	9	4
20	1	1	1	1	2	2	4	2	1	1	2	4	2	3	2	2	3	2	198	10	1	1	2	1	1	3	2	2	1	3	1	4	3	4	8	6	5	3	2	6	8	5	6	5	3	6	5	6	2
21	2	1	2	2	2	3	4	1	2	2	3	3	3	4	3	4	3	3	229	15	2	2	2	3	3	2	2	3	2	3	1	3	3	1	6	6	6	6	6	6	6	5	6	6	6	6	6	6	5
21	2	1	2	3	2	2	4	1	1	2	2	2	2	4	1	2	2	2	259	45	4	2	1	1	1	1	1	1	1	3	1	1	1	3	6	5	6	5	5	6	5	8	8	5	6	8	8	6	3
22	1	1	2	3	2	1	1	0	0	0	1	3	0	1	2	3	1	2	261	40	3	2	1	2	1	3	1	4	1	3	1	3	3	1	9	9	6	7	3	6	5	8	7	6	9	2	7	6	7
20	1	1	2	2	2	3	4	1	1	1	2	2	1	3	2	2	2	3	160	5	4	4	3	1	1	2	4	3	4	3	1	3	3	1	9	8	8	6	4	6	10	10	6	5	10	4	5	2	5
21	2	1	1	3	4	3	3	2	1	2	3	4	2	3	4	4	2	3	66	200	4	4	2	1	1	1	4	5	1	3	1	2	3	3	7	8	3	10	3	5	9	4	6	7	7	6	10	10	4
20	1	1	2	3	2	1	2	2	1	1	2	2	3	3	3	4	1	2	257	50	4	4	1	2	1	1	1	2	1	2	1	1	4	1	8	9	7	5	4	2	2	2	5	6	6	4	3	9	8
21	2	1	1	3	2	2	3	2	2	1	1	3	2	1	2	2	2	0	50	30	4	1	1	1	1	2	2	2	1	2	1	1	2	1	10	8	8	5	10	10	7	5	5	3	3	3	5	6	5
21	2	1	2	3	2	2	1	1	2	0	2	1	0	1	3	4	1	0	276	2	3	1	1	1	1	1	5	4	1	1	1	2	2	1	8	3	5	10	3	8	5	3	7	10	7	10	9	6	2
21	2	1	1	3	3	4	3	2	1	2	3	2	3	2	3	4	3	3	65	90	4	4	2	1	1	2	4	2	4	3	1	1	4	1	7	8	10	6	3	6	5	5	2	5	9	4	5	6	5
23	2	1	1	4	1	2	2	2	1	1	1	0	1	2	3	3	2	1	122	2	1	2	1	2	1	2	4	2	1	1	1	2	2	1	3	3	3	3	3	7	7	10	3	5	3	5	5	6	5
20	1	1	1	1	2	1	3	1	2	2	2	3	2	2	4	3	1	3	32	30	3	2	2	1	1	1	2	1	1	3	1	1	2	1	8	3	3	2	5	4	8	2	9	5	7	5	5	6	5
20	1	1	1	2	2	2	3	2	1	1	2	2	3	3	3	4	2	2	237	10	2	1	2	2	2	2	2	2	1	2	1	3	2	3	8	8	8	6	4	4	4	4	6	4	8	2	6	2	2
21	2	1	2	3	3	4	4	3	4	4	4	0	3	3	4	4	3	4	268	25	4	3	3	3	1	2	1	4	1	4	1	1	4	3	8	7	7	7	5	10	8	5	2	7	10	10	10	6	9
19	1	1	1	2	3	4	4	1	2	0	3	3	0	2	4	2	2	3	242	1	3	4	4	1	1	4	4	4	1	2	1	2	3	1	6	9	4	6	5	7	9	5	5	6	10	6	8	6	6
23	1	1	1	4	3	0	3	2	3	2	3	2	2	2	3	4	2	3	135	17.5	2	3	1	1	1	1	4	2	1	2	1	2	3	3	9	8	7	10	3	6	6	2	7	5	7	5	2	6	8
22	1	1	2	4	4	4	3	0	0	0	1	1	2	3	2	4	1	1	133	37.5	4	3	2	1	1	1	1	4	1	2	1	1	2	1	2	3	2	3	7	5	5	5	10	10	7	7	5	7	2
21	1	1	1	3	2	0	1	1	1	1	1	1	2	3	2	3	2	1	244	440	2	4	2	1	1	2	3	1	1	2	1	1	3	1	9	6	6	3	2	4	2	3	2	3	5	4	5	5	5
22	2	1	1	4	3	4	4	1	3	4	4	4	1	2	4	4	1	3	63	60	4	3	1	3	4	1	4	1	1	2	1	2	4	1	9	10	10	7	5	8	8	5	7	5	2	8	6	6	2
19	2	1	1	1	3	2	4	2	2	2	1	2	2	3	2	1	2	1	1	5	1	3	3	1	1	1	3	3	1	2	1	4	3	1	5	4	6	6	5	6	6	5	5	5	9	5	9	10	5
22	1	1	1	3	2	2	2	1	2	2	2	2	3	2	2	1	2	2	48	120	4	1	1	1	1	1	1	1	1	2	1	1	3	1	8	6	6	6	6	6	6	6	6	6	7	8	8	7	7
20	1	1	1	2	2	1	2	1	1	2	1	3	2	2	3	2	3	4	221	20	2	1	1	1	1	1	1	1	1	2	1	4	3	1	9	2	2	6	3	4	8	2	2	4	2	5	5	6	5
21	2	1	2	3	3	4	3	3	3	3	3	3	4	3	4	2	3	3	38	20	1	4	1	3	2	1	3	4	2	2	1	2	4	1	8	7	8	7	9	10	9	9	6	8	10	6	7	10	6
22	2	3	2	4	4	4	3	1	1	2	3	3	2	2	3	4	2	3	118	60	1	1	2	4	1	4	1	3	1	3	1	3	3	1	6	8	5	4	5	2	3	5	5	6	5	10	2	7	4
22	2	1	2	4	0	2	2	1	3	1	2	1	2	3	1	3	1	1	239	5	1	4	4	2	2	3	1	3	2	3	1	3	2	1	7	9	6	5	5	10	6	6	10	8	8	3	2	6	7
19	1	3	2	2	2	2	2	2	2	2	2	3	2	2	3	2	2	2	169	15	1	1	1	2	2	2	4	2	1	3	1	1	3	3	8	6	6	5	3	2	8	7	5	3	5	3	10	10	5
22	1	1	1	3	1	2	2	2	3	2	3	0	1	2	3	3	2	2	256	50	1	3	1	1	1	3	4	1	3	2	1	3	2	1	7	9	6	10	10	5	10	4	6	10	8	5	7	6	8
19	1	3	1	1	2	1	2	2	3	0	1	1	1	2	3	2	3	1	3	10	1	3	1	3	1	2	3	2	1	3	1	3	3	1	10	8	5	5	5	6	10	7	8	9	7	6	5	6	7
23	1	1	1	4	2	2	3	1	1	2	1	2	2	2	2	3	2	2	61	30	3	3	2	2	1	1	4	2	2	2	1	1	2	1	7	7	4	4	5	2	6	2	2	2	8	4	4	6	6
21	2	3	1	2	3	2	4	0	0	0	2	4	1	2	3	4	2	4	240	5	2	4	3	1	1	3	3	3	1	2	1	2	2	3	10	10	10	10	10	10	10	10	10	10	6	4	4	4	4
20	1	1	1	2	4	4	4	1	2	1	1	4	3	2	4	4	2	4	232	13	4	2	2	1	1	4	3	3	3	2	1	2	3	3	7	9.5	9	8	8	5	10	9	8	8	10	10	10	6	3
20	2	2	2	2	3	2	3	1	1	0	3	3	1	4	1	3	2	3	150	90	4	3	1	1	1	1	3	2	1	2	1	1	3	3	9	8	7	5	2	8	9	6	5	4	8	10	9	10	5
18	1	1	1	1	2	4	3	2	2	1	1	2	2	1	1	3	1	1	189	30	3	2	1	1	1	2	4	2	1	2	1	4	4	1	7	6	10	6	5	4	8	7	3	6	9	10	5	6	9
24	1	1	1	5	1	1	3	2	1	3	3	2	3	3	1	3	1	3	78	30	3	1	1	2	1	3	4	2	1	3	1	4	2	1	10	10	2	2	5	10	10	5	10	9	9	7	6	6	6
22	1	3	1	5	4	4	3	1	0	4	0	4	1	4	4	4	4	3	134	25	1	1	1	1	1	1	3	4	1	3	1	1	4	1	10	10	2	9	3	2	3	9	8	7	10	10	2	10	3
18	1	3	1	1	2	1	3	2	0	2	3	2	1	2	3	3	2	1	8	30	3	2	3	2	2	3	1	2	2	3	1	2	3	1	6	5	8	3	5	6	8	5	4	6	3	2	5	5	2
21	2	1	2	3	3	2	2	3	3	2	2	1	2	3	3	4	2	2	44	10	2	4	1	1	1	2	4	2	3	1	1	2	4	1	5	7	2	5	6	7	5	5	8	6	8	5	5	6	9
22	1	1	2	5	2	2	3	3	2	2	3	3	1	2	3	3	3	2	70	20	3	2	3	1	1	2	4	2	4	3	1	1	2	1	6	9	9	7	5	5	6	5	6	5	7	7	3	9	6
21	2	1	1	2	4	3	3	2	1	0	2	2	1	3	1	4	2	4	141	10	2	3	1	1	1	1	1	1	1	2	1	1	4	1	6	8	6	4	5	6	10	6	6	6	6	4	6	10	5
21	1	1	1	3	2	0	1	1	1	1	1	1	2	3	2	3	2	1	243	450	2	4	2	1	1	2	3	1	1	2	1	1	3	1	9	6	6	3	2	4	2	3	2	3	5	4	5	5	5
19	1	1	2	2	4	3	3	2	2	2	2	3	1	3	3	4	2	4	225	17	2	3	1	1	1	3	2	4	2	2	1	2	3	3	10	9	8	7	6	9	9	9	9	7	9	4	3	3	5
22	2	1	1	4	3	3	4	1	2	2	3	2	3	2	2	3	3	2	222	20	3	2	2	1	1	2	3	2	2	2	1	3	3	3	8	5	3	4	3	4	8	2	2	2	7	8	8	6	4
20	2	1	2	2	2	2	2	1	1	2	1	2	1	2	3	3	2	1	228	15	4	3	4	2	4	1	4	2	4	2	1	2	3	3	8	7	8	9	4	7	5	6	7	4	8	5	4	7	8
23	1	3	1	4	4	3	2	0	0	1	0	2	0	3	3	4	1	0	129	20	3	4	1	1	1	1	3	1	1	2	1	2	1	1	9	5	10	10	10	5	10	5	5	10	10	5	8	10	10
19	1	2	1	4	3	3	2	1	1	2	3	4	1	3	1	3	2	2	10	15	3	1	1	1	1	1	4	1	1	3	1	1	4	3	7	7	5	6	3	6	3	5	5	7	5	7	5	7	2
19	1	2	1	2	3	3	3	0	1	2	2	3	1	2	3	3	2	1	143	10	1	3	2	4	1	1	4	2	4	3	1	2	3	1	10	10	10	10	9	9	9	9	9	9	9	9	7	2	2
21	1	1	1	2	4	4	4	0	0	1	1	1	3	1	3	0	1	3	213	25	1	4	1	1	1	1	4	2	2	3	1	1	4	1	9	9	9	10	5	10	7	7	7	7	10	7	7	6	8
18	1	1	1	1	2	2	3	0	1	1	2	1	1	2	1	3	0	3	199	15	2	1	1	1	2	2	3	2	2	2	1	1	2	3	6	7	6	3	4	9	7	6	7	5	5	8	3	2	7
19	1	1	2	1	2	3	3	2	2	2	3	2	2	3	3	2	2	3	21	30	2	2	3	1	1	1	4	2	1	2	1	4	3	3	7	7	7	10	3	8	5	6	5	7	6	4	5	6	2
23	1	1	1	5	3	3	2	2	2	1	3	2	1	2	3	2	2	3	68	20	1	2	3	1	1	2	3	3	2	3	1	1	2	2	6	6	8	8	9	9	9	9	7	9	5	5	5	5	2
23	2	1	1	5	3	3	4	1	1	2	3	2	3	3	4	4	3	3	74	20	1	2	2	1	1	1	1	3	1	2	1	2	4	1	10	10	2	6	5	9	2	9	9	5	9	7	6	6	3
24	1	1	1	5	4	3	3	2	2	2	2	3	1	1	4	1	0	4	104	6	1	4	1	1	1	2	2	1	1	2	1	2	4	1	9	8	6	10	5	8	6	5	7	2	8	5	5	6	5
23	1	1	1	3	3	3	4	1	1	1	2	3	2	3	3	4	2	4	267	30	1	3	2	3	1	1	4	3	1	2	1	2	2	3	7	5	5	4	4	6	5	8	5	5	4	5	9	6	4
19	1	3	1	1	2	1	2	1	2	1	3	2	1	2	2	3	2	2	177	15	3	3	1	1	1	2	2	1	1	2	1	2	3	3	5	6	4	4	5	6	6	2	4	3	2	4	3	6	5
19	2	1	2	1	2	3	3	0	2	0	0	3	2	2	2	3	1	1	200	30	2	1	1	1	1	1	3	2	1	3	1	2	2	1	5	5	7	6	5	3	4	2	5	2	4	4	5	3	8
21	2	1	2	2	2	3	3	2	1	0	1	2	1	4	2	2	2	2	202	200	4	3	3	2	1	1	4	1	1	2	1	1	3	3	8	6	6	4	4	6	2	5	2	2	8	4	4	4	4
21	1	1	1	3	2	2	3	2	3	3	2	2	3	3	2	2	3	3	270	20	1	2	1	2	1	1	1	2	2	1	1	3	4	1	8	10	8	6	6	10	6	5	5	5	10	8	10	6	6
19	1	1	1	1	1	3	3	1	4	4	4	0	4	3	3	4	4	0	195	10	1	1	1	1	2	1	4	3	2	2	1	4	4	1	9	7	5	9	3	6	8	3	3	5	9	8	9	6	5
19	2	1	1	1	4	4	4	3	3	3	3	1	3	2	4	4	3	4	23	2	1	4	1	1	1	2	3	3	1	4	1	2	4	1	8	7	7	6	3	5	6	7	6	5	7	8	7	6	4
24	1	1	1	5	2	2	3	2	3	2	3	2	3	3	3	3	2	2	71	40	4	2	1	1	1	1	3	1	1	3	1	1	4	1	7	7	2	2	7	2	3	3	6	5	7	6	5	4	5
19	1	1	1	2	3	1	2	3	2	1	2	1	2	2	1	2	3	1	153	5	3	4	4	1	1	1	4	3	4	3	1	1	2	1	9	7	9	5	6	6	7	5	2	7	6	8	10	6	5
19	1	1	2	1	2	2	3	2	1	0	0	3	0	2	2	1	1	2	181	30	4	3	1	1	1	1	4	3	3	2	1	1	3	3	5	2	2	6	7	9	10	6	8	4	4	2	2	10	5
23	2	1	1	4	2	3	4	3	1	0	2	2	1	2	3	2	1	4	116	60	3	1	1	2	1	1	3	1	3	3	1	2	3	3	7	8	5	6	7	2	7	6	9	7	8	6	6	8	6
21	1	1	1	2	4	2	3	1	2	0	2	3	3	2	2	4	2	2	206	40	3	1	2	1	1	2	3	1	1	1	1	1	3	1	6	4	8	6	5	10	8	6	7	5	10	5	3	6	5
[truncated: 121 more columns]
